# Supplementary material for: The Role of Strigolactones in the Regulation of Root System Architecture in Grapevine (Vitis vinifera L.) in Response to Root-Restriction Cultivation
Source: MDPI journal article supplement (doi:10.3390/ijms22168799), 2021-08-16
Supplement: s1 [file s1]

**Table S2. Correlation between SLs-related gene expression levels and the weight of new roots in *V. vinifera***

| <b>Code</b> | <b>Annotation</b> | <b>The weight of new roots</b> |
|-------------|-------------------|--------------------------------|
| 1           | <i>VvMAX1</i>     | -0.009                         |
| 2           | <i>VvCCD7</i>     | -0.023                         |
| 3           | <i>VvCCD8</i>     | 0.400                          |
| 4           | <i>VvD27</i>      | -0.043                         |
| 5           | <i>VvDAD2</i>     | 0.360                          |
| 6           | <i>VvMAX2</i>     | 0.104                          |
| 7           | <i>VvSMAX1</i>    | 0.125                          |
| 8           | <i>VvSMAXL4</i>   | -0.032                         |
| 9           | <i>VvSMAXL3a</i>  | -0.048                         |
| 10          | <i>VvSMAXL3b</i>  | 0.033                          |
| 11          | <i>VvSMAXL6a</i>  | 0.319                          |
| 12          | <i>VvSMAXL6b</i>  | 0.084                          |
