# Supplementary material for: The Role of Strigolactones in the Regulation of Root System Architecture in Grapevine (Vitis vinifera L.) in Response to Root-Restriction Cultivation
Source: MDPI journal article supplement (doi:10.3390/ijms22168799), 2021-08-16
Supplement: s1 [file s1]

**Table S5. Correlation between SLs-related gene expression levels and the parameters and SLs content of grapevine roots at 20 DAA.**

| Code | Annotation       | (±)-2'-epi-5-deoxystrigol | strigol | (±)-2'-epi-5-deoxystrigol and strigol | Root length | Root diameter | Lateral root length | Lateral root density | Fine root number | Fine root density |
|------|------------------|---------------------------|---------|---------------------------------------|-------------|---------------|---------------------|----------------------|------------------|-------------------|
| 1    | <i>VvD27</i>     | -0.967                    | 0.557   | 0.956                                 | 0.441       | 0.379         | 0.862               | 0.918                | 0.991            | 0.606             |
| 2    | <i>VvMAX2</i>    | -0.181                    | 0.786   | 0.364                                 | 0.862       | 0.894         | 0.441               | -0.327               | -0.211           | -0.839            |
| 3    | <i>VvCCD8</i>    | -0.627                    | 0.986   | 0.122                                 | 0.999*      | 0.999*        | 0.815               | -0.737               | 0.279            | -0.479            |
| 4    | <i>VvCCD7</i>    | -0.631                    | 0.986   | 0.128                                 | 1 *         | 0.999*        | 0.818               | -0.741               | 0.284            | -0.474            |
| 5    | <i>VvMAX1</i>    | 0.948                     | 0.921   | 0.638                                 | 0.861       | 0.824         | 0.999*              | -0.985               | 0.753            | 0.07              |
| 6    | <i>VvDAD2</i>    | -0.772                    | 0.158   | 0.991                                 | 0.025       | -0.044        | 0.57                | -0.667               | 0.957            | 0.883             |
| 7    | <i>VvSMAX1</i>   | -0.984                    | 0.855   | 0.744                                 | 0.778       | 0.733         | 0.995               | -1 *                 | 0.841            | 0.215             |
| 8    | <i>VvSMAXL4</i>  | 0.887                     | 0.36    | -0.997*                               | 0.232       | 0.165         | 0.729               | -0.808               | 0.996            | 0.766             |
| 9    | <i>VvSMAXL3a</i> | 0.988                     | 0.636   | 0.922                                 | 0.528       | 0.469         | 0.908               | -0.953               | 0.972            | 0.524             |
| 10   | <i>VvSMAXL3b</i> | 0.993                     | 0.824   | 0.781                                 | 0.741       | 0.693         | 0.988               | -1 *                 | 0.87             | 0.27              |
| 11   | <i>VvSMAXL6a</i> | 0.656                     | -0.007  | 0.955                                 | -0.14       | -0.208        | 0.427               | -0.535               | 0.896            | 0.949             |
| 12   | <i>VvSMAXL6b</i> | -0.993                    | 0.944   | -0.587                                | 0.892       | 0.859         | 0.994               | -0.972               | 0.709            | 0.006             |

“\*” after the correlation coefficients represent the correlation between their mRNA expression levels and endogenous hormone levels and root parameters significantly different at  $P < 0.05$ .
