# Supplementary material for: The Role of Strigolactones in the Regulation of Root System Architecture in Grapevine (Vitis vinifera L.) in Response to Root-Restriction Cultivation
Source: MDPI journal article supplement (doi:10.3390/ijms22168799), 2021-08-16
Supplement: s1 [file s1]

**Table S7. Sequence of primers used for real-time PCR.**

| <b>Gene name</b> | <b>Accession No.</b> | <b>Forward primer sequences (5'→3')</b> | <b>Reverse primer sequences (5'→3')</b> |
|------------------|----------------------|-----------------------------------------|-----------------------------------------|
| <i>KyActin1</i>  | AB073011             | GATTCTGGTGATGGTGTGAGT                   | GACAATTTCCCGTTCAGCAGT                   |
| <i>VvMAX1</i>    | LOC100243924         | CCCTCTCCACCAAAGGGTC                     | GAATGCTTGCATGGTTGGCA                    |
| <i>VvD27</i>     | LOC100853223         | GCTGCCATGGTGTCAAGGAA                    | ATCACCTTGCAGGGTCCAAC                    |
| <i>VvCCD8</i>    | LOC100250765         | GAAGCCGGGGTACATAGTGG                    | GGGTGCCACTCGAACTTGTA                    |
| <i>VvCCD7</i>    | LOC100242750         | AAAATGTGGCGAACACCAGC                    | TCCGGCATCTTGAACACTCC                    |
| <i>VvDAD2</i>    | LOC100257558         | AAGGTGCCCTGCTGCATAAT                    | GGACCGGAGCCAGTAACATC                    |
| <i>VvMAX2</i>    | LOC104880827         | TCGGATTCAACGACTGCACA                    | GCTGGGGATACTTGGTTGCT                    |
| <i>VvSMAX1</i>   | LOC100260369         | TGGCTATTGTTACGGGTCC                     | CTGCTTCTGCAATGCGATCC                    |
| <i>VvSMAXL3a</i> | LOC100254493         | GTGTCTGGCGACTATCGAGG                    | CCTCTTCCCACGCAACTCTT                    |
| <i>VvSMAXL3b</i> | LOC100254987         | CGAATGTGGCTTTTGGGGAC                    | CTTACTTTGGAACCGGCCCT                    |
| <i>VvSMAXL4</i>  | LOC100247938         | GGAGGAACACGACAAGCTCA                    | ATCATCCTTTTGGCGGGCTT                    |
| <i>VvSMAXL6a</i> | LOC100260392         | GATTTGAACCTCCCGGCTGA                    | TGGTCTCGTGGAACGTCTTG                    |
| <i>VvSMAXL6b</i> | LOC100241532         | AGACTACGTCCCTACACGCT                    | GGAGGATGGCAAACGATCCA                    |
