# Supplementary material for: The Role of Strigolactones in the Regulation of Root System Architecture in Grapevine (Vitis vinifera L.) in Response to Root-Restriction Cultivation
Source: MDPI journal article supplement (doi:10.3390/ijms22168799), 2021-08-16
Supplement: s1 [file s1]

**Table S1. Correlation between gene expression levels and endogenous SLs content in *V. vinifera* roots.**

| Code | Annotation       | (±)-2'-epi-5-deoxystrigol | strigol | (±)-2'-epi-5-deoxystrigol and strigol |
|------|------------------|---------------------------|---------|---------------------------------------|
| 1    | <i>VvMAX1</i>    | 0.688                     | -0.139  | 0.67                                  |
| 2    | <i>VvCCD7</i>    | 0.357                     | -0.109  | 0.346                                 |
| 3    | <i>VvCCD8</i>    | 0.811*                    | 0.465   | 0.839**                               |
| 4    | <i>VvD27</i>     | 0.960**                   | -0.026  | 0.949**                               |
| 5    | <i>VvDAD2</i>    | -0.275                    | -0.427  | -0.305                                |
| 6    | <i>VvMAX2</i>    | -0.137                    | 0.646   | -0.087                                |
| 7    | <i>VvSMAX1</i>   | -0.567                    | -0.34   | -0.588                                |
| 8    | <i>VvSMAXL4</i>  | 0.123                     | -0.337  | 0.096                                 |
| 9    | <i>VvSMAXL3a</i> | 0.245                     | -0.243  | 0.224                                 |
| 10   | <i>VvSMAXL3b</i> | -0.048                    | -0.432  | -0.08                                 |
| 11   | <i>VvSMAXL6a</i> | -0.188                    | -0.612  | -0.233                                |
| 12   | <i>VvSMAXL6b</i> | 0.048                     | -0.207  | 0.032                                 |

“\*” and “\*\*” after the correlation coefficients represent the correlation between their mRNA expression levels and endogenous hormone levels significantly different at  $P < 0.05$  and  $P < 0.01$ , respectively.
