# Supplementary material for: The Role of Strigolactones in the Regulation of Root System Architecture in Grapevine (Vitis vinifera L.) in Response to Root-Restriction Cultivation
Source: MDPI journal article supplement (doi:10.3390/ijms22168799), 2021-08-16
Supplement: s1 [file s1]

**Table S6. Correlation between SLs-related gene expression levels and the parameters and SLs content of grapevine roots at 5 DAA.**

| Code | Annotation       | (±)-2'-epi-5-deoxystrigol | strigol | (±)-2'-epi-5-deoxystrigol and strigol | Root length | Root diameter | Lateral root length | Lateral root density | Fine root number | Fine root density |
|------|------------------|---------------------------|---------|---------------------------------------|-------------|---------------|---------------------|----------------------|------------------|-------------------|
| 1    | <i>VvD27</i>     | 0.557                     | 0.987   | 0.771                                 | 0.881       | 0.217         | 0.459               | -0.298               | 0.108            | -0.193            |
| 2    | <i>VvMAX2</i>    | 0.786                     | 0.932   | 0.339                                 | 0.999*      | -0.31         | 0.847               | -0.742               | 0.599            | 0.333             |
| 3    | <i>VvCCD8</i>    | 0.986                     | -0.962  | 0.426                                 | -0.852      | 0.22          | -0.794              | 0.676                | -0.522           | -0.244            |
| 4    | <i>VvCCD7</i>    | 0.986                     | 0.976   | 0.56                                  | -0.979      | 0.272         | 0.408               | -0.243               | 0.052            | -0.249            |
| 5    | <i>VvMAX1</i>    | 0.921                     | 0.848   | 0.03                                  | -0.937      | -0.481        | 0.931               | -0.854               | 0.737            | 0.502             |
| 6    | <i>VvDAD2</i>    | 0.158                     | 0.634   | 1*                                    | -0.2        | 0.807         | -0.242              | 0.407                | -0.575           | -0.793            |
| 7    | <i>VvSMAX1</i>   | 0.855                     | -0.24   | 0.889                                 | 0.876       | -0.983        | 0.635               | -0.76                | 0.871            | 0.978             |
| 8    | <i>VvSMAXL4</i>  | 0.36                      | 0.777   | 0.699                                 | -0.399      | 0.672         | -0.041              | 0.214                | -0.398           | -0.654            |
| 9    | <i>VvSMAXL3a</i> | 0.636                     | 0.998*  | 0.436                                 | -0.669      | 0.126         | 0.539               | -0.384               | 0.199            | -0.102            |
| 10   | <i>VvSMAXL3b</i> | 0.824                     | 0.999*  | 0.173                                 | -0.847      | 0.11          | 0.552               | -0.399               | 0.214            | -0.087            |
| 11   | <i>VvSMAXL6a</i> | -0.007                    | -0.409  | 0.418                                 | -0.035      | 0.888         | -0.976              | 0.999*               | -0.989           | -0.899            |
| 12   | <i>VvSMAXL6b</i> | 0.944                     | 0.999*  | 0.631                                 | -0.957      | 0.022         | 0.624               | -0.479               | 0.3              | 0.002             |

“\*” after the correlation coefficients represent the correlation between their mRNA expression levels and endogenous hormone levels and root parameters significantly different at  $P < 0.05$ .
