# Supplementary material for: The Role of Strigolactones in the Regulation of Root System Architecture in Grapevine (Vitis vinifera L.) in Response to Root-Restriction Cultivation
Source: MDPI journal article supplement (doi:10.3390/ijms22168799), 2021-08-16
Supplement: s1 [file s1]

**Table S4. Correlation between root parameters and SLs content in *V. vinifera* roots at 20 DAA.**

| <b>Code</b> | <b>Root phenotype</b> | <b>(±)-2'-epi-5-deoxystrigol</b> | <b>strigol</b> | <b>(±)-2'-epi-5-deoxystrigol and strigol</b> |
|-------------|-----------------------|----------------------------------|----------------|----------------------------------------------|
| 1           | Root length           | -0.655                           | 0.991          | -0.159                                       |
| 2           | Root diameter         | -0.602                           | 0.98           | -0.09                                        |
| 3           | Lateral root length   | -0.963                           | 0.901          | -0.675                                       |
| 4           | Lateral root density  | 0.989                            | -0.841         | 0.761                                        |
| 5           | Fine root number      | -0.923                           | 0.438          | -0.987                                       |
| 6           | Fine root density     | -0.383                           | -0.324         | -0.812                                       |
