# Supplementary material for: The Role of Strigolactones in the Regulation of Root System Architecture in Grapevine (Vitis vinifera L.) in Response to Root-Restriction Cultivation
Source: MDPI journal article supplement (doi:10.3390/ijms22168799), 2021-08-16
Supplement: s1 [file s1]

**Table S3. Correlation between root parameters and SLs content in *V. vinifera* roots at 5 DAA.**

| <b>Code</b> | <b>Root phenotype</b> | <b>(±)-2'-epi-5-deoxystrigol</b> | <b>strigol</b> | <b>(±)-2'-epi-5-deoxystrigol and strigol</b> |
|-------------|-----------------------|----------------------------------|----------------|----------------------------------------------|
| 1           | Root length           | -0.038                           | -0.946         | -0.377                                       |
| 2           | Root diameter         | 0.951                            | 0.056          | 0.789                                        |
| 3           | Lateral root length   | -0.533                           | 0.597          | -0.212                                       |
| 4           | Lateral root density  | 0.672                            | -0.448         | 0.379                                        |
| 5           | Fine root number      | -0.802                           | 0.267          | -0.55                                        |
| 6           | Fine root density     | -0.944                           | -0.032         | -0.774                                       |
